# Supplementary material for: SOX9 indirectly regulates CEACAM1 expression and immune resistance in melanoma cells
Source: PubMed Central journal article supplement (PMC5058672; doi:10.18632/oncotarget.7379), 2016-02-14
Supplement: oncotarget-07-30166-s001.pdf [file oncotarget-07-30166-s001.pdf]

## SOX9 indirectly regulates CEACAM1 expression and immune resistance in melanoma cells

### Supplementary Material

#### Supplementary Table 1: Primers

##### Real-time primers

| Gene    | Forward primer            | Reverse Primer            |
|---------|---------------------------|---------------------------|
| SOX9    | 5'- CCCTATCGACTTCCGCGAC   | 5'-TCGTTGACATCGAAGGTCTCG  |
| CEACAM1 | 5'- GAGTAGTGGCCCTGGTTGCTC | 5'- CGCTGGTCGCTTGCCCT     |
| ETS1    | 5'- CTGACCCAGATGAGGTG     | 5'- CGCTGTCTTGTGGATGAT    |
| GAPDH   | 5'- TGCACCACCAACTGCTTAGC  | 5'- CGCATGGACTGTGGTCATGAG |

##### Cloning primers

| Insert         | Forward primer              | Reverse Primer            |
|----------------|-----------------------------|---------------------------|
| SOX9 cDNA      | 5'- CATGAATCTCCTGGACCCC     | 5'- TCAAGGTCGAGTGAGCTGT   |
| pCEACAM1 full  | 5'- GTTCCAGTGATTCTCCTGC     | 5'- GGTGTCTCCTGCTGGC      |
| pCEACAM1 600bp | 5'- CTGAGACCCCTGGACTTGGGTCT | 5'- GGTGTCTCCTGCTGGCCCTGT |
| pCEACAM1 500bp | 5'- CCACCTCTGTCACCTCC       | 5'- GGTGTCTCCTGCTGGC      |
| pCEACAM1 400bp | 5'- GGATATGCCAGGGTTCTCT     | 5'- GGTGTCTCCTGCTGGC      |
| pCEACAM1 300bp | 5'- CTGATGGGGACAGAGGTC      | 5'- GGTGTCTCCTGCTGGC      |
| pCEACAM1 200bp | 5'- AGGACAAAGGTAGGAATGAGAG  | 5'- GGTGTCTCCTGCTGGC      |

Mutations / deletions primers

|                                          | Position                         | Location upstream to start codon | Primers                                                         |
|------------------------------------------|----------------------------------|----------------------------------|-----------------------------------------------------------------|
| Deletion of SOX9 site 1 in pCEACAM1      | Chr19,<br>42530146 -<br>42530151 | (-1777) - (-1772) bp             | Fw: 5'- GACCACACCTGGCTAATTTTTTT<br>TAGTAGAGACGGGG               |
|                                          |                                  |                                  | Rev: 5'- CCCCCTCTCTACTAAAAAAAATT<br>AGCCAGGTGTGGTC              |
| Deletion of SOX9 sites 2 & 3 in pCEACAM1 | Chr19,<br>42529777 -<br>42529793 | (-1419) - (-1403) bp             | Fw: 5'- ATTCTCAAGCCCCCAAAGGCACT<br>TTTTGTTTTGTTTTGTTTTGC        |
|                                          |                                  |                                  | Rev: 5'- GCAAAAACAAAACAAAACAAAA<br>AGTGCCTTTGGGGGCTTGAGAAT      |
| Deletion of SOX9 sites 4-7 in pCEACAM1   | Chr19,<br>42529740 -<br>42529776 | (-1402) - (-1366) bp             | Fw: 5'- GCCCCCAAAGGCACCCTCTGGG<br>ACAGAT                        |
|                                          |                                  |                                  | Rev: 5'- ATCTGTCCAGAGGGTGCCTTTG<br>GGGGC                        |
| Deletion of SOX9 site 8 in pCEACAM1      | Chr19,<br>42528704 -<br>42528710 | (-336) - (-330) bp               | Fw: 5'- CCCATAGCCAGGACAGGTCAGT<br>GCTGGA                        |
|                                          |                                  |                                  | Rev: 5'- TCCAGCACTGACCTGTCCTGGCT<br>ATGGG                       |
| Mutation of Sp1 site in                  | Chr19,                           | (-165) - (-152) bp               | Fw: 5'- AATGAGAGGAGAGGAAACAGA<br>GCTTCCTGGACAGTAACCGAACAGCACACA |

|                                                 |                                  |                    |                                                                         |
|-------------------------------------------------|----------------------------------|--------------------|-------------------------------------------------------------------------|
| pCEACAM1                                        | 42528526 -<br>42528539           |                    | TGATCAG                                                                 |
|                                                 |                                  |                    | Rev: 5'- CTGATCATGTGTGCTGGTTCGGTTAC<br>TGTCAGGAAGCTCTGTTTCCTCTCCTCTCATT |
| Mutation of ETS1 site 1<br>in pCEACAM1          | Chr19,<br>42528569 -<br>42528565 | (-199) - (-195) bp | Fw: 5'- AGAGAAAGTAAGGACAAAGGT<br>AAAAATGAGAGGAGAGGAAACAGAG              |
|                                                 |                                  |                    | Rev: 5'- CTCTGTTTCCTCTCCTCTCATTTT<br>TACCTTTGTCCTTACTTTCTCT             |
| Mutation of ETS1 site 2<br>in pCEACAM1          | Chr19,<br>42528555 -<br>42528559 | (-185) - (-181) bp | Fw: 5'- CAAAGGTAAAAATGAGAGGA<br>GAAAAACAGAGCTTCTGGACAAAC                |
|                                                 |                                  |                    | Rev: 5'- GTTTGTCCAGGAAGCTCTGTTTT<br>TTCTCTCTCATTTTTACCTTTG              |
| Mutation of ETS1 site 3<br>in pCEACAM1          | Chr19,<br>42528543 -<br>42528547 | (-173) - (-169) bp | Fw: 5'- AAAATGAGAGGAGAAAAAAC<br>AGAGCTTTTTGGACAAACCCCGC                 |
|                                                 |                                  |                    | Rev: 5'- GCGGGGTTTGTCCAAAAGCTC<br>TGTTTTTCTCCTCTCATTTT                  |
| Mutation of ETS1 site 4<br>in pCEACAM1          | Chr19,<br>42528425 -<br>42528429 | (-55) - (-51) bp   | Fw: 5'- CAGCCGTGCTCGAAGCGTTTTTG<br>GAGCCAAG                             |
|                                                 |                                  |                    | Rev: 5'- CTTGGGCTCCAAAACGCTTCGA<br>GCACGGCTG                            |
| Deletion of AP-2<br>binding site in<br>pCEACAM1 | Chr19,<br>42528485 -<br>42528500 | (-126) - (-111) bp | Fw: 5'- GATCAGACAAAGCTCTGCTCAG<br>CACAGAGAGTGG                          |
|                                                 |                                  |                    | Rev: 5'- CCACTCTCTGTGCTGAGCAGAGC<br>TTTGTCTGATC                         |

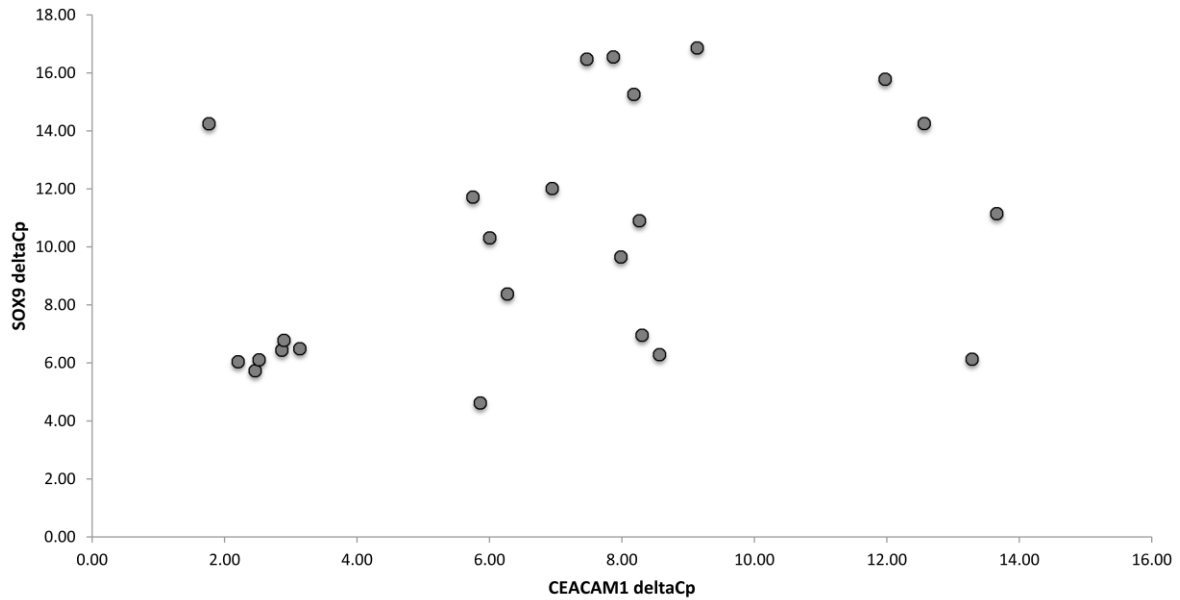

**Figure 1: SOX9 and CEACAM1 mRNA expression in melanoma cell cultures.** SOX9 and CEACAM1 mRNA expression in melanoma cell lines and low passage metastatic melanoma cultures, as determined by qPCR. Data represent one experiment performed in triplicates.
